# Supplementary material
Source: publisher figshare collection journal article supplement (https://future-science-group.figshare.com/articles/dataset/_/23905068)

# 细胞遗传质量鉴定检测

## Cell Line Authentition Service

### STR 基因型检测报告

## 样品信息

样品编号:

| 客户样本编号      | 公司编号        |
|-------------|-------------|
| 20220302-15 | 20220302-15 |

样品数量: 1

样品性状: 细胞系

检测项目: STR

送检单位: 厦门逸漠生物科技有限公司

**检测方法：**用TIANGEN的基因组抽提试剂盒提取DNA，采用23- STR扩增方案扩增，在ABI 3130XL型遗传分析仪上对STR位点和性别基因Amelogenin、Yindel进行检测。

# 检测结果

## (一) 检验基本情况

|             | 多等位基因 | 匹配细胞系 | 细胞库    | EV 值 | 匹配说明 |
|-------------|-------|-------|--------|------|------|
| 20220302-15 | 有     | CNE-1 | EXPASY | 0.95 | 基本匹配 |

样本基因型检验结果

- 多等位基因指三等位及以上基因现象。
- 本次检测各细胞分型结果良好。

## (二) 各样本描述

- **20220302-15：**该株细胞DNA 分型在细胞系检索中找到**基本匹配**的细胞系，EXPASY 数据库显示细胞名为 **CNE-1**，细胞号对应 **CVCL 6888**。本次检测在该细胞系中**发现多等位基因**。

**备注：**待测细胞系与收录于 ATCC, DSMZ, JCRB 和 RIKEN 数据库的细胞系 STR 数据进行比对，未收录于以上细胞库的细胞系将无法匹配。

## (三) 样本分型结果

| 细胞20220302-15的 STR 位点和Amelogenin 、Yindel位点的基因分型结果 |                   |         |         |              |         |         |
|---------------------------------------------------|-------------------|---------|---------|--------------|---------|---------|
| Loci                                              | 送检细胞 STR 信息       |         |         | 细胞库细胞 STR 信息 |         |         |
|                                                   | 送检细胞名：20220302-15 |         |         | 细胞库细胞名：CNE-1 |         |         |
|                                                   | Allele1           | Allele2 | Allele3 | Allele1      | Allele2 | Allele3 |
| Yindel                                            | --                | --      |         |              |         |         |
| AMEL                                              | X                 | X       |         | X            | X       |         |

|         |    |    |      |    |    |      |
|---------|----|----|------|----|----|------|
| D3S1358 | 15 | 16 | 18   | 15 | 18 |      |
| D13S317 | 10 | 12 | 13.3 | 10 | 12 | 13.3 |
| D7S820  | 10 | 12 |      | 10 | 12 |      |
| D16S539 | 9  | 10 | 11   | 9  | 10 |      |
| D8S1179 | 12 | 12 |      | 12 | 16 |      |
| Penta D | 9  | 12 |      |    |    |      |
| D19S433 | 13 | 13 |      | 13 | 13 |      |
| D5S818  | 11 | 12 |      | 11 | 12 |      |
| D21S11  | 27 | 30 |      | 27 | 30 |      |
| TPOX    | 8  | 12 |      | 8  | 12 |      |
| D1S1656 | 12 | 15 | 16   |    |    |      |
| D6S1043 | 11 | 14 | 18   |    |    |      |
| D2S441  | 11 | 11 |      |    |    |      |
| D12S391 | 20 | 21 |      |    |    |      |
| D2S1338 | 17 | 23 |      | 17 | 23 |      |
| vWA     | 14 | 16 |      | 14 | 16 |      |
| Penta E | 17 | 17 |      |    |    |      |
| TH01    | 6  | 7  | 9    | 6  | 7  | 9    |
| D18S51  | 13 | 16 |      | 13 | 16 |      |
| CSF1PO  | 10 | 11 |      | 10 | 11 |      |
| FGA     | 18 | 21 |      | 18 | 21 |      |

# 其他说明

## (一) 分型方案及位点分布

|   | 方案 1    | 方案 2    | 方案 3    | 方案 4   |
|---|---------|---------|---------|--------|
| 1 | Yindel  | D19S433 | D2S411  | TH01   |
| 2 | AMEL    | D5S818  | D12S391 | D18S51 |
| 3 | D3S1358 | D21S11  | D2S1338 | CSF1PO |
| 4 | D13S317 | TPOX    | VWA     | FGA    |
| 5 | D7S820  | D1S1656 | PENTAE  |        |
| 6 | D16S539 | D6S1043 |         |        |
| 7 | D8S1179 |         |         |        |
| 8 | PENTAD  |         |         |        |

实验方案及位点

## (二) STR数据库比对

本公司采用 DSMZ tools 进行细胞系比对，其中包含来自于 ATCC, DSMZ, JCRB 和 RIKEN 数据库的2455个细胞系STR数据。如果待检测细胞未收录于以上细胞库或这是自行建立的新细胞系将无法进行比对，用户需根据细胞分型结果自行与其他数据库进行比对。

签发日期：2022年03月15日

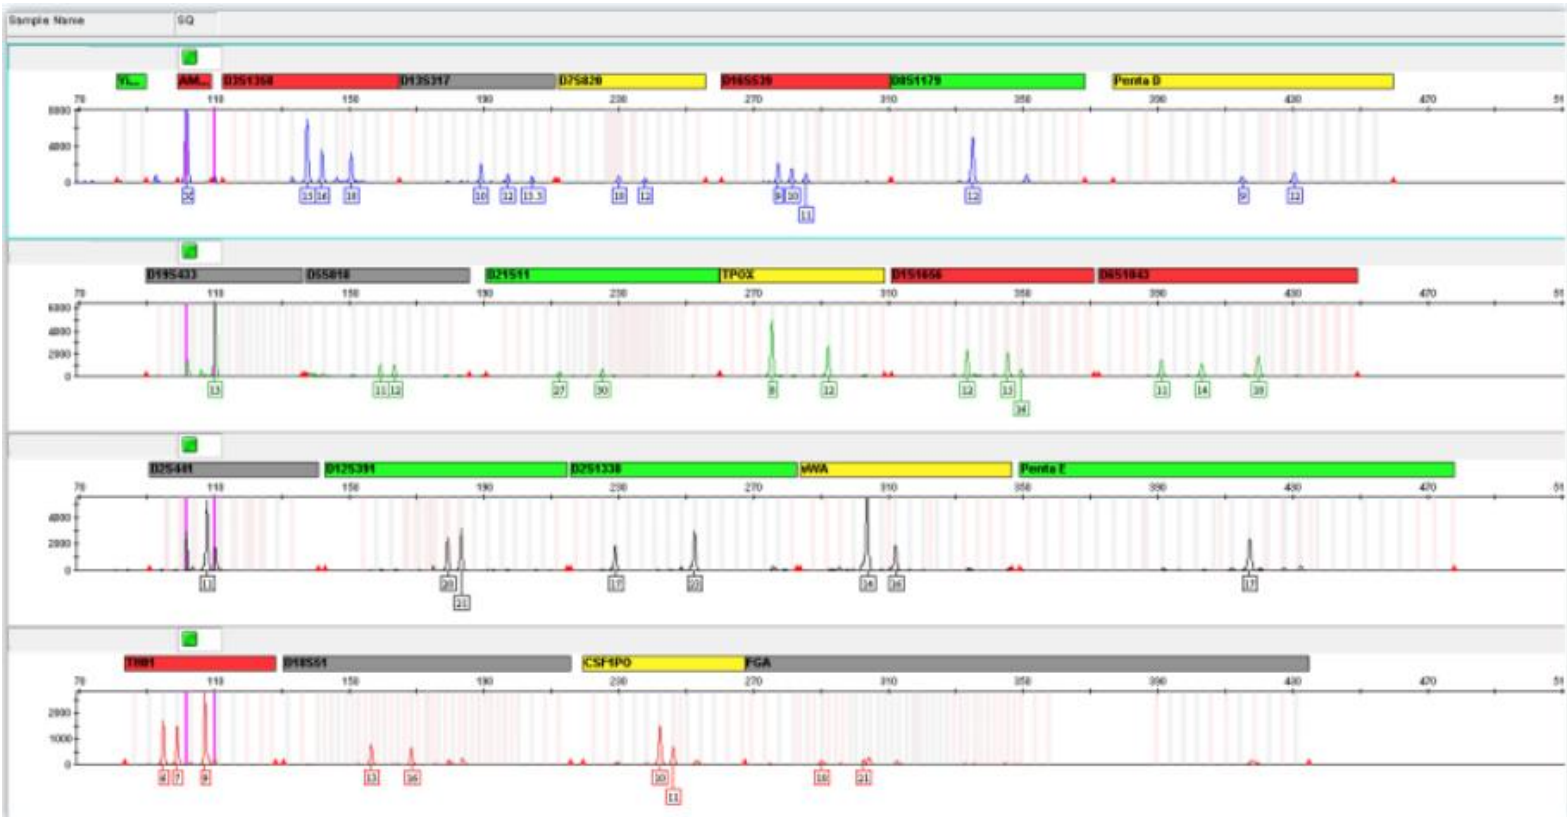

## 细胞 STR 检测报告

一、样品名称/编号：HONE-1, BNCC338405

二、检测项目：STR 基因型检验

三、检测方法：用天根的基因组抽提试剂盒提取 DNA，采用 21-STR 扩增方案扩增，在 Seqstudio 型遗传分析仪上对 STR 位点和性别基因 Amelogenin 进行检测。

四、检验结果：

### 1. 检验基本情况

| 多等位基因 | 匹配细胞系  | 细胞库    | EV 值 | 匹配说明 |
|-------|--------|--------|------|------|
| 有     | HONE-1 | ExPASy | 0.82 | 基本匹配 |

多等位基因指三等位及以上基因现象。

本次检测各细胞分型结果良好。

### 2. 样本描述

该株细胞 DNA 分型在细胞系检索中找到基本匹配的细胞系，ExPASy 数据库显示细胞名为 HONE-1 细胞号对应 CVCL-8706。本次检测在该细胞系中发现多等位基因。

### 3. 匹配说明

待测细胞系与收录于 ATCC, DSMZ, JCRB 和 ExPASy 数据库的细胞系 STR 数据进行比对，未收录于以上细胞库的细胞系将无法匹配。

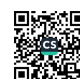

附表：HONE-1 细胞的 STR 位点和 Amelogenin 位点的基因分型结果

| HONE-1 细胞 |          |          |          |
|-----------|----------|----------|----------|
| Marker    | Allele 1 | Allele 2 | Allele 3 |
| D19S433   | 13       | 13       |          |
| D5S818    | 13       | 13       |          |
| D21S11    | 30       | 31.2     |          |
| D18S51    | 12       | 12       |          |
| D6S1043   | 11       | 11       |          |
| AMEL      | X        | X        |          |
| D3S1358   | 18       | 18       |          |
| D13S317   | 10       | 10       |          |
| D7S820    | 10       | 10       |          |
| D16S539   | 9        | 11       |          |
| CSF1PO    | 12       | 12       |          |
| Penta D   | 9        | 9        |          |
| D2S441    | 10       | 10       |          |
| vWA       | 14       | 20       |          |
| D8S1179   | 10       | 14       |          |
| TPOX      | 8        | 8        |          |
| Penta E   | 10       | 12       |          |
| TH01      | 9.3      | 9.3      |          |
| D12S391   | 20       | 20       |          |
| D2S1338   | 23       | 23       |          |
| FGA       | 24       | 24       |          |

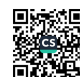

### 附图：ExPASy 数据库比对结果

|        |         |   |        |   |         |       |       |         |         |       |          |       |        |        |      |      |      |
|--------|---------|---|--------|---|---------|-------|-------|---------|---------|-------|----------|-------|--------|--------|------|------|------|
| ExPASy | Protein | 8 | 52.35% | X | 10.11   | 11.12 | 10.12 | 10.12   | 9.10.11 | 7.6.6 | 22.07    | 14.2  | 1.1.2  | 1.2.07 | 5.9  | 8.2  | 14.0 |
| ExPASy | Protein | 8 | 61.00% | X | 10      | 11.12 | 9.14  | 10.12   | 9.10    | 11.14 | 20.12    | 14.25 | 1.1.2  | 1.2.07 | 7.9  | 9    | 12   |
| ExPASy | Protein | 8 | 18.57% | X | 31      | 12    | 10.12 | 12      | 9       | 11.14 | 31.1.2.1 | 1.1.2 | 1.2.07 | 7.9    | 8    | 14.0 |      |
| ExPASy | Protein | 8 | 71.78% | X | 10.11.2 | 11.12 | 10.12 | 9.10.11 | 7.6.6   | 22.07 | 14.2     | 1.1.2 | 1.2.07 | 7.9    | 8.11 | 14.0 |      |
| ExPASy | Protein | 8 | 77.62% | X | 10.11   | 11.12 | 10.12 | 12      | 14      | 11.14 | 20.12    | 14.25 | 1.1.2  | 1.2.07 | 7.9  | 8.9  | 14.0 |

### 分型方案及位点分布

|   | 方案 1    | 方案 2    | 方案 3    | 方案 4    |
|---|---------|---------|---------|---------|
| 1 | D19S433 | AMEL    | D2S441  | TH01    |
| 2 | D5S818  | D3S1358 | vWA     | D12S391 |
| 3 | D21S11  | D13S317 | D8S1179 | D2S1338 |
| 4 | D18S51  | D7S820  | TPOX    | FGA     |
| 5 | D6S1043 | D16S539 | Penta E |         |
| 6 |         | CSF1PO  |         |         |
| 7 |         | Penta D |         |         |

检测人：张葡萄

审核人：殷世腾

签发日期：2022.09.08

河南省工业微生物菌种工程技术研究中心

Henan Engineering Research Center of Industrial Microbiology

网址：www.bncc.org.cn 电话：400-6699-833

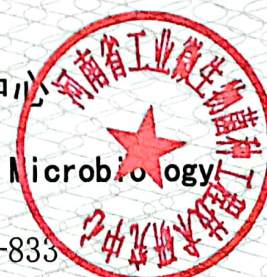

扫描全能王 创建

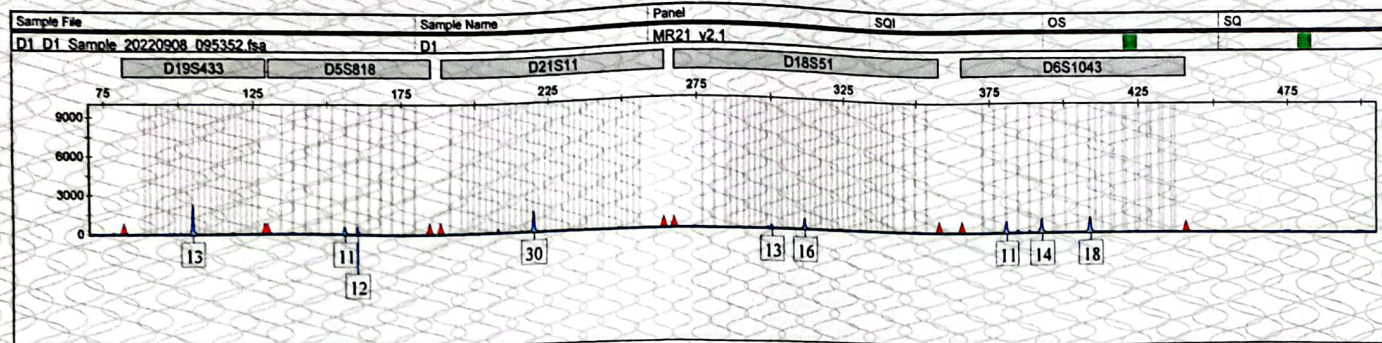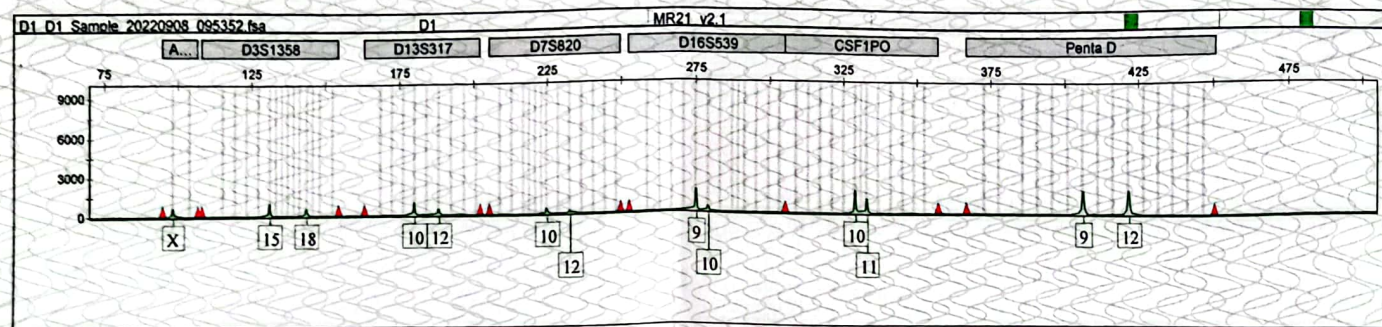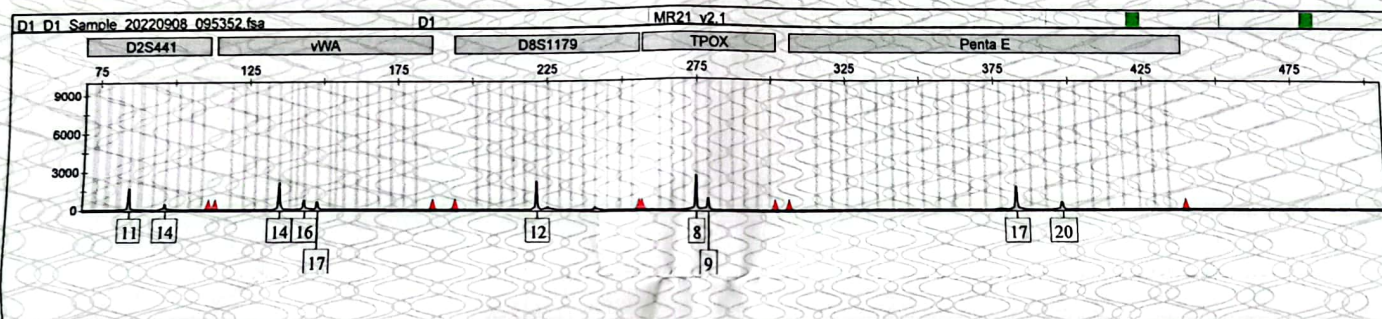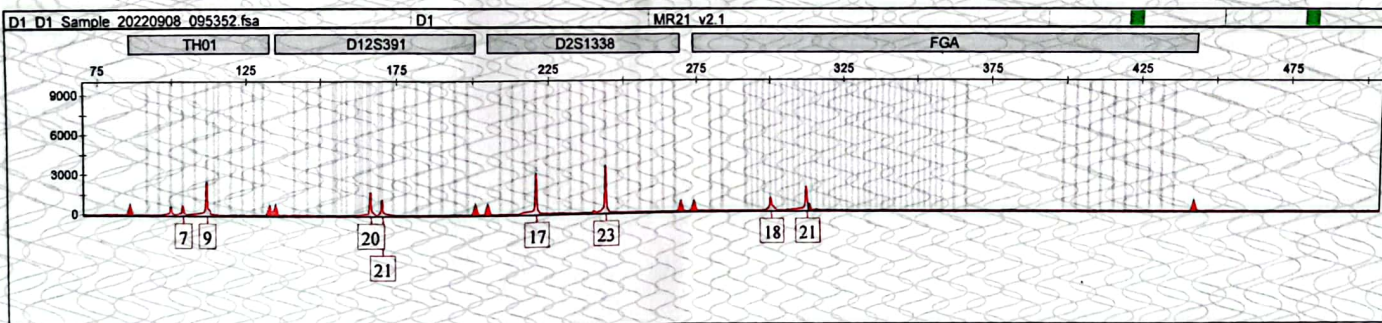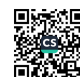

Supplement: Supplementary file 1 [file 1]
