# Supplementary material
Source: publisher figshare collection journal article supplement (https://future-science-group.figshare.com/articles/dataset/_/23905068)
Supplement: Supplementary file 1 [file 1]

**Supplementary Table 1 Forward and reverse primer sequences**

| PCR Primer | Sequences (5′-3′) |
| --- | --- |
| LMP1-F | GAAGAAGGCCAAAAGCTGCC |
| LMP1-R | CTCCTGCTCATCGCTCTCTG |
| CYP1A1-F | CACAGCA CAACAAGAGACACAA |
| CYP1A1-R | TAGCCAGGAAGAGAAAGACCTC |
| CYP1B1-F | TTCCAAAGAAAGTTCTACAGTGTCC |
| CYP1B1-R | CCCACCCCACACACACATAC |
| β-actin-F | TCCTGTGGCATCCACGAAACT |
| β-actin-R | GAAGCATTTGCGGTGGACGAT |
